# Supplementary material
Source: Elsevier journal article supplement (https://www.sciencedirect.com/science/article/pii/S2531043721001525)
Supplement: mmc1 [file S2531043721001525:mmc1.docx]

Supplementary Table 1: Sequences of oligonucleotide primers used for the analysis of gene polymorphisms

| SNP | 1st-PCRP | 2nd-PCRP | UEP_DIR | UEP |
| --- | --- | --- | --- | --- |
| rs6473227 | ACGTTGGATGGATCACAAACACAGATTATCC | ACGTTGGATGTGCATATTGGCCTTATTTCC | R | tatgCCTTAGTTTGAATGGCTTTT |
| rs16907751 | ACGTTGGATGTGCCAAACTCTACCTGTCTC | ACGTTGGATGAGAGAAACAACTAGAACAC | R | ACTAGAACACTAAAAATATTGTGAC |
| rs2608029 | ACGTTGGATGTTCCCATGTGCTCTGTGTAG | ACGTTGGATGACTCTAGAGTTAGACCCCAG | R | cctgTAGACCCCAGAAATGAGTAT |
| rs13280095 | ACGTTGGATGGCTAATAGCCAAACCTTGAG | ACGTTGGATGCCTGACCTGCACCTACTCAT | F | gccgGCACCTACTCATCCCTTC |

SNP, single nucleotide polymorphism; PCRP, polymerase chain reaction primer; UEP_DIR, unique base extension primer direction; F, forward; R, reverse; UEP, unique base extension primer.

Sequences are written in the 5'-3' (left to right) orientation.
